# Supplementary material
Source: MDPI journal article supplement (https://www.mdpi.com/2306-5729/7/4/44)
Supplement: s1 [file s1]

Archive with 1 entries (1 files):
- data-1634816-Supplemeantary material.pdf
